# Supplementary material for: t6A and ms2t6A Modified Nucleosides in Serum and Urine as Strong Candidate Biomarkers of COVID-19 Infection and Severity
Source: MDPI journal article supplement (doi:10.3390/biom12091233), 2022-09-03
Supplement: s1 [file s1]

## SUPPLEMENTARY DATA

**Figure S1.** Correlations between modified nucleosides in serum and clinical indicators of COVID-19.

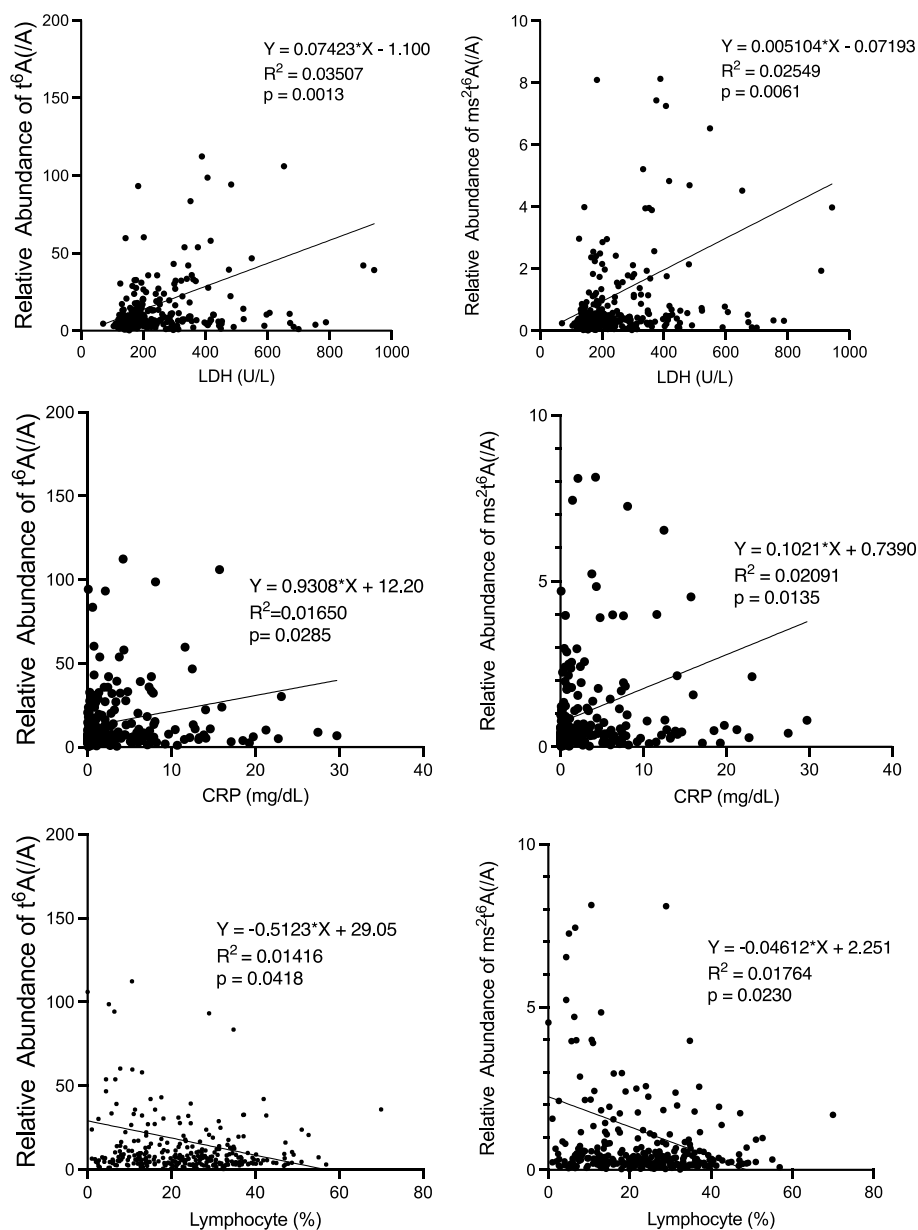

Abbreviations: WBC: white blood cells; LDH: lactate dehydrogenase; CRP: C-reactive protein

**Table S1.** MRM transition parameters for modified nucleosides.

| Nucleosides     | Precursor ion (m/z) | Product ion (m/z) |
|-----------------|---------------------|-------------------|
| $\Psi$          | 245.10              | 209.00            |
| Cm              | 258.25              | 112.05            |
| $m^1A$ , $m^6A$ | 282.30              | 150.05            |
| Um              | 259.00              | 113.00            |
| Gm              | 298.10              | 152.10            |
| Im              | 283.10              | 137.10            |
| $m^2_2G$        | 312.10              | 180.10            |
| $t^6A$          | 413.10              | 281.10            |
| Am              | 282.10              | 136.00            |
| $ms^2t^6A$      | 459.10              | 327.10            |

|                                 |        |        |
|---------------------------------|--------|--------|
| m <sup>6</sup> <sub>2</sub> A   | 296.00 | 164.00 |
| m <sup>6</sup> t <sup>6</sup> A | 427.30 | 136.00 |
| m <sup>6</sup> Am               | 296.00 | 150.05 |
| D                               | 247.00 | 115.00 |
| U                               | 245.00 | 113.00 |
| G                               | 284.00 | 152.05 |
| C                               | 244.20 | 112.10 |
| A                               | 268.00 | 136.00 |

Ψ: pseudouridine; Cm: 2'-O-methylcytidine; m<sup>1</sup>A: N<sup>1</sup>-methyladenosine; m<sup>6</sup>A: N<sup>6</sup>-methyladenosine; Um: 2'-O-methyluridine; Gm: 2'-O-methylguanosine; Im: 2'-O-methylinosine; m<sup>2</sup><sub>2</sub>G: N<sup>2</sup>,N<sup>2</sup>-dimethylguanosine; t<sup>6</sup>A: N<sup>6</sup>-threonylcarbamoyladenine; Am: 2'-O-methyladenosine; ms<sup>2</sup>t<sup>6</sup>A: 2-methylthio-N<sup>6</sup>-threonylcarbamoyladenine; m<sup>6</sup><sub>2</sub>A: N<sup>6</sup>,N<sup>6</sup>-dimethyladenosine; m<sup>6</sup>t<sup>6</sup>A: N<sup>6</sup>-methyl-threonylcarbamoyladenine; m<sup>6</sup>Am: N<sup>6</sup>,2'-O-dimethyladenosine; D: dihydrouridine; U: uridine; C: cytidine; G: guanosine; A: adenosine.

**Table S2.** Information of the patients with other infectious diseases.

#### Bacterial infection

| Patient number | Diagnosis                                                          | Physical examinations or tests related diagnosis                                                                                  |
|----------------|--------------------------------------------------------------------|-----------------------------------------------------------------------------------------------------------------------------------|
| Patient 1      | Bacterial pneumoniae and pleurisy                                  | Fever, elevated CRP, pneumoniae image on CT scan, and bacterial detection in turbid pleural fluid.                                |
| Patient 2      | Bacterial pneumoniae                                               | Fever, elevated CRP, pneumoniae image on CT scan, and bacterial detection by Gram staining of sputum.                             |
| Patient 3      | Bacterial pneumoniae                                               | Fever, elevated CRP, pneumoniae image on CT scan, and bacterial detection by Gram staining of sputum.                             |
| Patient 4      | Bacterial pneumoniae and pleurisy                                  | Fever, elevated CRP, pneumoniae image on CT scan, and bacterial detection in turbid pleural fluid.                                |
| Patient 5      | Bacterial pneumoniae                                               | Fever, elevated CRP, pneumoniae image on CT scan, and bacterial detection by Gram staining of sputum.                             |
| Patient 6      | Bacterial pneumoniae and pleurisy                                  | Fever, elevated CRP, pneumoniae image on CT scan, and bacterial detection in turbid pleural fluid.                                |
| Patient 7      | Bacterial pneumoniae                                               | Fever, elevated CRP, pneumoniae image on CT scan, and bacterial detection by Gram staining of sputum.                             |
| Patient 8      | Bacterial pneumoniae and pleurisy by <i>Pseudomonas aeruginosa</i> | Fever, elevated CRP, pneumoniae image on CT scan, and bacterial detection in blood culture test.                                  |
| Patient 9      | Bacterial pneumoniae                                               | Fever, elevated CRP, pneumoniae image on CT scan, and bacterial detection by Gram staining of sputum.                             |
| Patient 10     | Bacterial pneumoniae by <i>Streptococcus pneumoniae</i>            | Fever, elevated CRP, pneumoniae image on CT scan, and rapid urinary antigen test of <i>Streptococcus pneumoniae</i> was positive. |

|            |                                                         |                                                                                                                                   |
|------------|---------------------------------------------------------|-----------------------------------------------------------------------------------------------------------------------------------|
| Patient 11 | Bacterial pneumoniae                                    | Fever, elevated CRP, pneumoniae image on CT scan, and bacterial detection by Gram staining of sputum.                             |
| Patient 12 | Bacterial pneumoniae                                    | Fever, elevated CRP, pneumoniae image on CT scan, and bacterial detection by Gram staining of sputum.                             |
| Patient 13 | Bacterial pneumoniae by <i>Streptococcus pneumoniae</i> | Fever, elevated CRP, pneumoniae image on CT scan, and rapid urinary antigen test of <i>Streptococcus pneumoniae</i> was positive. |
| Patient 14 | Bacterial pneumoniae                                    | Fever, elevated CRP, pneumoniae image on CT scan, and bacterial detection by Gram staining of sputum.                             |
| Patient 15 | Bacterial pneumoniae                                    | Fever, elevated CRP, pneumoniae image on CT scan, and bacterial detection by Gram staining of sputum.                             |
| Patient 16 | Bacterial pneumoniae by <i>Haemophilus influenzae</i>   | Fever, elevated CRP, pneumoniae image on CT scan, and bacterial detection by blood culture test.                                  |
| Patient 17 | Bacterial pneumoniae                                    | Fever, cough, elevated CRP, pneumoniae image on CT scan, and bacterial detection by Gram staining of sputum.                      |
| Patient 18 | Bacterial pneumoniae                                    | Fever, cough, elevated CRP, pneumoniae image on CT scan, and bacterial detection by Gram staining of sputum.                      |

### Viral infection

| Patient number | Diagnosis                         | Physical examinations or tests related diagnosis          |
|----------------|-----------------------------------|-----------------------------------------------------------|
| Patient 1      | Influenza A                       | Fever and the results of Rapid antigen test was positive. |
| Patient 2      | Influenza B                       | Fever and the results of Rapid antigen test was positive. |
| Patient 3      | Influenza A                       | Fever and the results of Rapid antigen test was positive. |
| Patient 4      | Influenza A                       | Fever and close contact with Influenza A patient.         |
| Patient 5      | Influenza A                       | Fever and the results of Rapid antigen test was positive. |
| Patient 6      | Influenza B                       | Fever and the results of Rapid antigen test was positive. |
| Patient 7      | Influenza B                       | Fever and the results of Rapid antigen test was positive. |
| Patient 8      | Influenza A                       | Fever and the results of Rapid antigen test was positive. |
| Patient 9      | Influenza A                       | Fever and close contact with Influenza A patient.         |
| Patient 10     | Influenza A                       | Fever and the results of Rapid antigen test was positive. |
| Patient 11     | Upper respiratory tract infection | Fever and sore throat.                                    |
| Patient 12     | Influenza A                       | Fever and the results of Rapid antigen test was positive. |
| Patient 13     | Influenza A                       | Fever and the results of Rapid antigen test was positive. |
| Patient 14     | Influenza A                       | Fever and the results of Rapid antigen test was positive. |
| Patient 15     | Influenza A                       | Fever and the results of Rapid antigen test was positive. |
| Patient 16     | Influenza A                       | Fever and the results of Rapid antigen test was positive. |
| Patient 17     | Influenza A                       | Fever and the results of Rapid antigen test was positive. |
| Patient 18     | Influenza A                       | Fever and the results of Rapid antigen test was positive. |
| Patient 19     | Influenza A                       | Fever and the results of Rapid antigen test was positive. |

|            |             |                                                           |
|------------|-------------|-----------------------------------------------------------|
| Patient 20 | Influenza A | Fever and the results of Rapid antigen test was positive. |
| Patient 21 | Influenza A | Fever and the results of Rapid antigen test was positive. |
| Patient 22 | Influenza A | Fever and the results of Rapid antigen test was positive. |
| Patient 23 | Influenza A | Fever and the results of Rapid antigen test was positive. |
| Patient 24 | Influenza A | Fever and the results of Rapid antigen test was positive. |
